# Supplementary material
Source: ML conference proceedings conference paper supplement (https://proceedings.neurips.cc/paper_files/paper/2022/hash/99c80ceb10cb674110f03b2def6a5b76-Abstract.html)
Supplement: Supplementary file 1 [file 99c80ceb10cb674110f03b2def6a5b76-Supplemental-Conference.pdf]

---

# – Appendix –

## Bézier Gaussian Processes for Tall and Wide Data

---

**Martin Jørgensen**  
 Department of Engineering Science  
 University of Oxford  
 martinj@robots.ox.ac.uk

**Michael A. Osborne**  
 Department of Engineering Science  
 University of Oxford  
 mosb@robots.ox.ac.uk

### 1 Computations in the Bézier Buttress

This sections seeks to explain how the KL-divergence is computed using the Bézier buttress. It further explains more detailed parametrisation in the architecture. For completeness we here give a forward pass to compute  $\text{Var}(f(\mathbf{x}))$ .

$$\text{Var}(f(\mathbf{x})) = \mathbf{1}_{\nu_1+1}^\top \mathbf{w}_1 \mathbf{B}_{x_1}^2 \cdots \mathbf{w}_d \mathbf{B}_{x_d}^2 \mathbf{1}_{\nu_d+1}, \quad (1)$$

here we make the choice that  $\{\mathbf{w}_\gamma\}_{i,j} := \exp(v_{i,j}) \varsigma_{\gamma_i}$ . This ensures positive weights and hence a positive output for the variance of  $f$ .  $\varsigma_\gamma$  comes from the inverse squared Bernstein adjusted prior (see Section 2).  $v$  are free parameters to be inferred in the variational posterior. This parametrisation makes computing the KL terms easier.

We remark all the following calculation are only for *one* Bézier buttress. Are there multiple Bézier buttresses, with different orderings of layers, the computations are equivalent for all of them.

For computing the KL we first recall from the paper

$$\begin{aligned} \text{KL}(q(\mathbf{P}) \| p(\mathbf{P})) &= \sum_{i_1=0}^{\nu_1} \sum_{i_2=0}^{\nu_2} \cdots \sum_{i_d=0}^{\nu_d} \text{KL}(q(\mathbf{P}_{i_1, \dots, i_d}) \| p(\mathbf{P}_{i_1, \dots, i_d})) \\ &= \sum_{i_1=0}^{\nu_1} \sum_{i_2=0}^{\nu_2} \cdots \sum_{i_d=0}^{\nu_d} \left\{ \frac{\hat{\Sigma}_{i_1, i_2, \dots, i_d}}{\Sigma_{i_1, i_2, \dots, i_d}} - 1 + \frac{\hat{\vartheta}_{i_1, i_2, \dots, i_d}^2}{\Sigma_{i_1, i_2, \dots, i_d}} + \log \frac{\Sigma_{i_1, i_2, \dots, i_d}}{\hat{\Sigma}_{i_1, i_2, \dots, i_d}} \right\}. \end{aligned} \quad (2)$$

For easier reference we declare

$$S_1 := \sum_{i_1=0}^{\nu_1} \sum_{i_2=0}^{\nu_2} \cdots \sum_{i_d=0}^{\nu_d} \frac{\hat{\Sigma}_{i_1, i_2, \dots, i_d}}{\Sigma_{i_1, i_2, \dots, i_d}}, \quad (4)$$

$$S_2 := \sum_{i_1=0}^{\nu_1} \sum_{i_2=0}^{\nu_2} \cdots \sum_{i_d=0}^{\nu_d} \frac{\hat{\vartheta}_{i_1, i_2, \dots, i_d}^2}{\Sigma_{i_1, i_2, \dots, i_d}}, \quad (5)$$

$$S_3 := \sum_{i_1=0}^{\nu_1} \sum_{i_2=0}^{\nu_2} \cdots \sum_{i_d=0}^{\nu_d} \log \frac{\Sigma_{i_1, i_2, \dots, i_d}}{\hat{\Sigma}_{i_1, i_2, \dots, i_d}}. \quad (6)$$

We remind again that “hat” notation refers to parameters from variational posterior  $q$ . We also remind that the prior variance is given  $\Sigma_{i_1, \dots, i_d} = \prod_{\gamma=1}^d \varsigma_\gamma(i_\gamma)$ . Because we have included  $\varsigma$  in the parametrisation in the posterior  $\hat{\Sigma}_{i_1, \dots, i_d}$ , they are cancelling out in the expression in  $S_1$  and  $S_3$ . We get

$$S_1 = \mathbf{1}_{\nu_1+1}^\top \exp \mathbf{v}_1 \cdots \exp \mathbf{v}_d \mathbf{1}_{\nu_d+1}. \quad (7)$$

where  $\exp$  is element-wise on the matrices.

For  $S_3$  we make the observation, based again on  $\varsigma$  cancelling out in the fraction, that

$$\log \frac{\sum_{i_1, i_2, \dots, i_d} \log \sum_{i_1, i_2, \dots, i_d}}{\sum_{i_1, i_2, \dots, i_d}} = -\log \prod_{\gamma=1}^d \exp v_{i_{\gamma-1}, i_{\gamma}, \gamma} = \sum_{\gamma=1}^d v_{i_{\gamma-1}, i_{\gamma}, \gamma}. \quad (8)$$

That is, summing over  $\log \sum_{i_1, i_2, \dots, i_d}$  is basically counting how many paths (i.e. control points) use  $v_{i_{\gamma-1}, i_{\gamma}, \gamma}$ . That is determined as  $\psi_{\gamma} = \frac{\tau}{(\nu_{\gamma-1}+1)(\nu_{\gamma}+1)}$ . Here  $\nu_0 := 0$ . Hence,

$$-S_3 = \sum_{\gamma=1}^d \psi_{\gamma} \bigoplus \mathbf{v}_{\gamma}, \quad (9)$$

where  $\bigoplus$  denotes summing the elements in the matrix.

Notice how the *variational* parametrisation of  $\{\mathbf{w}_{\gamma}\}_{i,j} := \exp(v_{i,j})\varsigma_{\gamma_i}$  was carefully chosen for easily computing  $S_1$  and  $S_3$ .

$S_2$  is more close to what described in main paper. We simply just need to square all the weights and correct with the prior variance. That is, correct with  $1/\varsigma_{\gamma}$ . Hence,

$$S_2 = \mathbf{1}_{\nu_1+1}^{\top} \mathbf{w}_1^2 \varsigma_1^{-1} \cdots \mathbf{w}_d^2 \varsigma_d^{-1} \mathbf{1}_{\nu_d+1}, \quad (10)$$

where here  $\varsigma_{\gamma}$  is the diagonal matrix with  $\varsigma_{\gamma_i}$  along its diagonal, for  $i = 1, \dots, \nu_{\gamma}$ . Notice further here  $\mathbf{w}$  are the weights in the *mean* Bézier buttress.

Now

$$\text{KL}(q(\mathbf{P})\|p(\mathbf{P})) = S_1 - \tau + S_2 + S_3, \quad (11)$$

all of which are computed in a single forward pass in the Bézier buttress.  $\tau$  is the number of all control points (in one buttress).

## 2 Numerical results

For reproducibility we give the values used to generate Figure 4. These are given in Table 1.

| year                    | buzz                    | houseelectric          | slice                                         |
|-------------------------|-------------------------|------------------------|-----------------------------------------------|
| Test log-likelihood     |                         |                        |                                               |
| B20: $-3.6209 \pm 0.00$ | B20: $-0.0832 \pm 0.01$ | B20: $1.5987 \pm 0.00$ | B3: $-0.5321 \pm 1.36$ B5: $-2.7831 \pm 1.49$ |
| Test RMSE               |                         |                        |                                               |
| B20: $9.0461 \pm 0.01$  | B20: $0.2629 \pm 0.00$  | B20: $0.0489 \pm 0.00$ | B3: $0.0761 \pm 0.01$ B5: $0.0880 \pm 0.02$   |

Table 1: Numerical values used create Figure 4. Here is listed average and standard deviation over 3 splits. On *year* the test-set was not standardised to compare with baselines there.
